# Supplementary material for: Evolution of Helicobacter spp: variability of virulence factors and their relationship to pathogenicity
Source: PeerJ. 2022 Aug 29;10:e13120. doi: 10.7717/peerj.13120 (PMC9435515; doi:10.7717/peerj.13120)
Supplement: Supplemental Information 2 — Annotation errors are indicated for each gene per genome. The NCBI database ID is indicated for each genome analyzed. [file peerj-10-13120-s002.xlsx]

## Sheet: Plan1
			Urease											Adherence										Inmune evasion					Flagella genes
	Species	Accesion	ureA	Ure A (Copy)	ureB	ure B (Copy)	ureI	ureI (copy)	ureE	ureE copy	ureF	ureG	ureH/D	alpA/hopC	alpB/hopB	babA/hopS	babB/hopT	hpaA	hopZ	horB	peb1	sabA/hopP	sabB/hopO	futA	futB	futC	napA	oipA/hopH	flaA	flaB	flaB copy	flaG	fliR	flgI	flgL	flgH	fliF	fliG	fliH	flgG_1	flhA	flhF	fliA	fliM	fliY	fliN	fliP	fliD	fliS
1	Campylobacter fetus	NC_008599	0	0	0	0	0	0	0	0	0	0	0	0	0	0	0	0	0	0	0	0	0	0	0	0	0	0	1	1	0	1	1	1	0	1	1	1	1	1	1	1	1	1	1	1	1	1	1
2	Helicobacter pylori	NC_000915.1	1	0	1	0	1	0	1	0	1	1	1	1	1	1	1	1	1	1	0	1	1	1	1	1	1	1	1	1	0	1	1	1	1	1	1	1	1	1	1	1	1	1	1	1	1	1	1
3	Helicobacter acinonychis str. Sheeba	NC_008229	1	1	1	1	1	0	1	0	1	1	1	1	1	0	0	0	0	1	0	0	0	1	1	1	1	1	1	1	0	1	1	1	1	1	1	1	1	1	1	1	1	1	1	1	1	1	1
4	Helicobacter cetorum	NC_017735	1	1	1	1	1	0	1	0	1	1	1	1	1	0	0	0	0	1	0	0	0	0	1	0	1	0	1	1	0	1	1	1	1	1	1	1	1	1	1	1	1	1	1	1	1	1	1
5	Helicobacter felis	NC_014810	1	1	1	1	1	0	1	0	1	1	1	0	0	0	0	0	0	0	0	0	0	0	0	0	0	0	1	1	0	1	1	1	1	1	1	1	1	1	1	1	1	1	1	1	1	1	1
6	Helicobacter bizzozeronii	NC_015674	1	0	1	0	1	0	1	0	1	1	1	0	0	0	0	0	0	0	0	0	0	0	0	0	0	0	1	1	0	1	1	0	1	1	1	1	1	1	1	0	1	1	1	1	1	1	1
7	Helicobacter suis	NZ_AP019774	1	0	1	0	1	0	1	0	1	1	1	0	0	0	0	0	0	0	0	0	0	0	0	0	0	0	1	1	0	1	1	1	1	1	1	1	1	1	1	1	1	1	1	1	1	1	1
8	Helicobacter heilmanni	HE984298.2	1	1	1	1	1	1	1	1	1	1	1	0	0	0	0	0	0	0	0	0	0	0	0	0	0	0	1	1	0	1	1	1	1	1	1	1	1	1	1	1	1	1	1	1	1	1	1
9	Helicobacter mustelae	NC_013949	1	0	1	1	1	0	1	0	1	1	1	0	0	0	0	0	0	0	0	0	0	0	0	0	0	0	1	1	0	1	1	1	1	1	1	1	1	1	1	1	1	1	1	1	1	1	1
10	Helicobacter canis	NZ_LR698964	0	0	0	0	0	0	0	0	0	0	0	0	0	0	0	0	0	0	0	0	0	0	0	0	0	0	1	1	0	0	1	1	1	1	1	1	1	1	1	1	1	1	1	1	1	1	1
11	Helicobacter macacae	KI669454.1	0	0	0	0	0	0	0	0	0	0	0	0	0	0	0	0	0	0	0	0	0	0	0	0	0	0	1	0	0	1	1	1	1	0	1	1	1	1	1	1	1	1	1	1	1	1	1
12	Helicobacter fennelliae	NZ_UGIB01000001	0	0	0	0	0	0	0	0	0	0	0	0	0	0	0	0	0	0	0	0	0	0	0	0	0	0	1	1	0	1	1	1	1	1	1	1	1	1	1	1	1	1	1	1	1	1	1
13	Helicobacter cinaedi	NC_020555	0	0	0	0	0	0	0	0	0	0	0	0	0	0	0	0	0	0	0	0	0	0	0	0	0	0	1	1	0	1	1	1	1	1	1	1	1	1	1	1	1	1	1	1	1	1	1
14	Helicobacter hepaticus	NC_004917	1	0	1	0	1	0	1	0	1	1	1	0	0	0	0	0	0	0	1	0	0	0	0	0	0	0	1	1	1	1	1	1	1	1	1	1	1	1	1	1	1	1	1	1	1	1	1
15	Helicobacter typhlonius htyphlonius	NZ_LN907858	0	0	0	0	0	0	0	0	0	0	0	0	0	0	0	0	0	0	0	0	0	0	0	0	0	0	1	1	0	1	1	1	1	1	1	1	1	1	1	1	1	1	1	1	1	1	1
16	Helicobacter pametensis	NZ_UYIU01000001	0	0	0	0	0	0	0	0	0	0	0	0	0	0	0	0	0	0	0	0	0	0	0	0	0	0	0	0	0	0	0	0	0	0	0	0	0	0	0	0	0	0	0	0	0	0	0
17	Helicobacter bilis	NZ_CP019645	1	0	1	0	1	0	1	0	1	1	1	0	0	0	0	0	0	0	0	0	0	0	0	0	0	0	1	1	1	0	1	1	0	0	1	1	1	1	1	1	1	1	1	1	1	1	1
18	Helicobacter muridarum	NZ_UGJE01000002	1	0	1	0	1	0	1	0	1	1	1	0	0	0	0	0	0	0	0	0	0	0	0	0	0	0	1	1	1	1	1	1	1	1	1	1	1	1	1	1	1	1	1	1	1	1	1
19	Helicobacter canadensis	NZ_CM000776	0	0	0	0	0	0	0	0	0	0	0	0	0	0	0	0	0	0	0	0	0	0	0	0	0	0	1	1	0	1	1	1	1	1	1	1	1	1	1	1	1	1	1	1	1	1	1
20	Helicobacter pullorum	NZ_LR134509	0	0	0	0	0	0	0	0	0	0	0	0	0	0	0	0	0	0	0	0	0	0	0	0	0	0	1	1	0	1	1	1	1	1	1	1	1	1	1	1	1	1	1	1	1	1	1
21	Helicobacter apodemus	NZ_CP021886	1	0	1	0	0	0	1	0	1	1	1	0	0	0	0	0	0	0	0	0	0	0	0	0	0	0	1	1	0	1	1	1	1	1	1	1	1	1	1	1	1	0	1	1	1	1	1
22	Helicobacter cholecystus	NZ_LR134518	0	0	0	0	0	0	0	0	0	0	0	0	0	0	0	0	0	0	0	0	0	0	0	0	0	0	1	1	0	1	1	1	1	1	1	1	1	1	1	1	1	1	1	1	1	1	1
23	Helicobacter himalayensis	NZ_CP014991	0	0	0	0	0	0	0	0	0	0	0	0	0	0	0	0	0	0	0	0	0	0	0	0	0	0	1	1	0	1	1	1	1	1	1	1	1	0	1	1	1	1	1	1	1	1	1
		Total genes	12	4	12	5	11	1	12	1	12	12	12	3	3	1	1	1	1	3	1	1	1	2	3	2	3	2	22	21	3	20	22	21	20	20	22	22	22	21	22	21	22	21	22	22	22	22	22
		gene annotation erros	8	4	8	2	1	0	0	1	0	0	2	0	0	0	0	0	0	0	0	0	0	0	0	0	0	0	5	2	0	0	0	0	0	0	0	0	0	17	0	0	0	0	2	2	0	0	0
	Assigned as another paralogous gene	33
	Hypothetical protein	1
	Incomplete annotation	38
	Gene not reported	1
		73
[truncated: 61 more columns]
